# Supplementary material
Source: PubMed Central journal article supplement (PMC3583494)
Supplement: supp_mol.112.082875_SupplementalFigureS1.pdf [file supp_mol.112.082875_SupplementalFigureS1.pdf]

# Differentiation of opioid drug effects by hierarchical multi-site phosphorylation

Sascha Just, Susann Illing, Michelle Trester-Zedlitz, Elaine K. Lau, Sarah J. Kotowski, Elke Miess, Anika Mann, Christian Doll, Jonathan C. Trinidad, Alma L. Burlingame, Mark von Zastrow, Stefan Schulz

Molecular Pharmacology MOL #82875

## Supplemental Figure S1

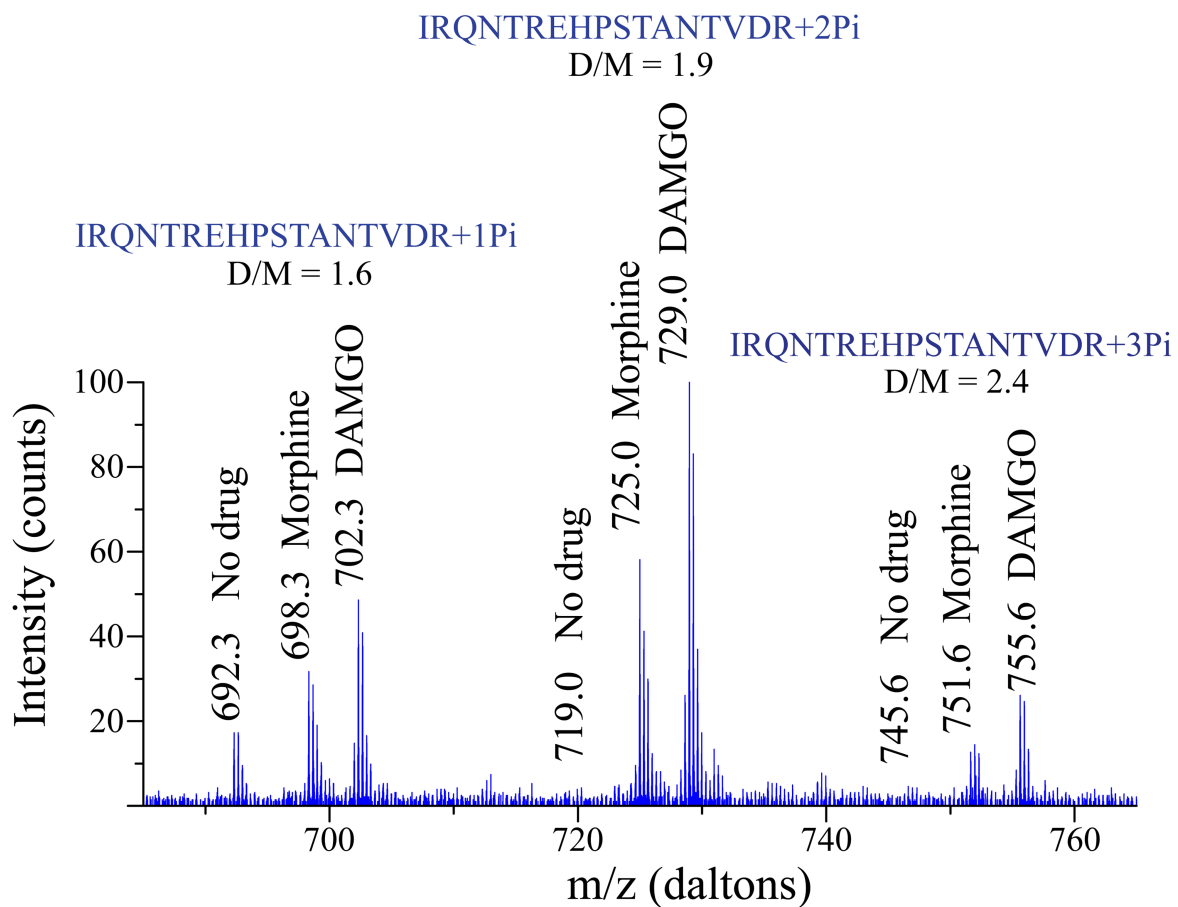

### Supplemental Figure S1: The $\mu$ -opioid receptor cytoplasmic tail undergoes agonist-selective multi-site phosphorylation within 2 minutes at physiological temperature.

Receptors were purified by anti-Flag affinity chromatography after exposure of isotope-labeled cells to 10  $\mu$ M DAMGO or 10  $\mu$ M morphine for 2 minutes at 37°C. The indicated phosphopeptides corresponding to the middle portion of the  $\mu$ -opioid receptor cytoplasmic tail representing single (+1P), double (+2P) and triple (+3P) phosphorylation in this region. Adjusted isotope ratios were calculated by summing signal count areas for 2-3 mass isotope peaks, adjusted for isotope overlap, and calibrated using an internal MOR reference peptide. No signal above noise was observed for the No drug condition at m/z = 745.6. The adjusted isotope ratio indicating the relative abundance of each species between DAMGO and morphine conditions (D/M) is indicated over each set of peaks.
